# Supplementary material for: The INSIEME seismic network: a research infrastructure for studying induced seismicity in the High AgriValley (southern Italy)
Source: Copernicus journal article supplement (doi:10.5194/essd-2019-113), 2019-07-05
Supplement: Supplementary file 1 [file essd-2019-113-supplement.zip]

*Supplement of*

# **The INSIEME seismic network: an experimental observatory for studying induced seismicity in the High Agri Valley (southern Italy)**

Tony Alfredo Stabile et al.

5 *Correspondence to:* Tony Alfredo Stabile (tony.stabile@imaa.cnr.it)

- ESSD-Supplement-title-page.pdf
- INSIEME-network.kmz
- 3F.INS1.dataless
- 3F.INS2.dataless
- 10 • 3F.INS3.dataless
- 3F.INS4.dataless
- 3F.INS5.dataless
- 3F.INS6.dataless
- 3F.INS7.dataless
- 15 • 3F.INS8.dataless
